# Supplementary material for: Reproducibility of Preschool Personnel and Guardian Reports on Energy Balance-Related Behaviors and Their Correlates in Finnish Preschool Children
Source: Children (Basel). 2018 Oct 23;5(11):144. doi: 10.3390/children5110144 (PMC6262525; doi:10.3390/children5110144)
Supplement: Supplementary file 1 [file children-05-00144-s001.pdf]

**Supplement Table 1.** The intraclass correlations (ICCs) or Kappa values ( $\kappa$ ) of guardians' questionnaire items in the DAGIS reproducibility sub-study. If both values are reported, the order is ICC/  $\kappa$ . If only Kappa value is presented, it is indicated in parenthesis after item.

| Guardians' questionnaire                  |                                                                                                                                              |                                                                                                                       | ICC/ $\kappa$    | 95 %<br>confidence interval |                  | N  |
|-------------------------------------------|----------------------------------------------------------------------------------------------------------------------------------------------|-----------------------------------------------------------------------------------------------------------------------|------------------|-----------------------------|------------------|----|
| Response options                          |                                                                                                                                              |                                                                                                                       |                  |                             |                  |    |
| <b>Sedentary behavior and screen time</b> |                                                                                                                                              |                                                                                                                       |                  |                             |                  |    |
| 1.                                        | I am pleased with my child's screen time                                                                                                     | 1=strongly disagree; 2=somewhat disagree; 3=neither disagree or agree; 4=somewhat agree; 5=strongly agree             | 0.607            | 0.436                       | 0.737            | 69 |
| 2.                                        | How confident are you that you could do the following? I can say no to my child's requests to use screens even when the child has a tantrum. | 1= not at all confident; 2= somewhat unconfident; 3= something between; 4= somewhat confident; 5= extremely confident | 0.648            | 0.487                       | 0.767            | 69 |
| 3.                                        | Sometimes it seems like the only way to get my child to behave is to promise screen time as a reward.                                        | 1=strongly disagree; 2=somewhat disagree; 3=neither disagree or agree; 4=somewhat agree; 5=strongly agree             | 0.656            | 0.498                       | 0.771            | 69 |
| 4.                                        | It is important for me to limit my child's screen time.                                                                                      | 1=strongly disagree; 2=somewhat disagree; 3=neither disagree or agree; 4=somewhat agree; 5=strongly agree             | 0.780            | 0.667                       | 0.858            | 69 |
| 5.                                        | It is important for me that screen time does not take time from child's physical activity.                                                   | 1=strongly disagree; 2=somewhat disagree; 3=neither disagree or agree; 4=somewhat agree; 5=strongly agree             | 0.539            | 0.346                       | 0.687            | 69 |
| 6.                                        | It's important for my child to learn how to use electronic devices, because I'm not very good at using them myself.                          | 1=strongly disagree; 2=somewhat disagree; 3=neither disagree or agree; 4=somewhat agree; 5=strongly agree             | 0.584            | 0.404                       | 0.721            | 69 |
| 7.                                        | I make sure that there are other activities available for my child to do instead of using electronic devices.                                | 1=strongly disagree; 2=somewhat disagree; 3=neither disagree or agree; 4=somewhat agree; 5=strongly agree             | 0.086 /<br>0.031 | -0.156/<br>-0.183           | 0.317 /<br>0.244 | 69 |
| 8.                                        | There is pressure from society to purchase and use different electronic devices.                                                             | 1=strongly disagree; 2=somewhat disagree; 3=neither disagree or agree; 4=somewhat agree; 5=strongly agree             | 0.619            | 0.450                       | 0.746            | 69 |
| 9.                                        | I think the suitable amount of screen time for 3-6 year olds on weekdays is at a maximum of X minutes                                        | Open ended question                                                                                                   | 0.569            | 0.386                       | 0.708            | 69 |

|     |                                                                                                                                 |                                                                                                                  |       |       |       |    |
|-----|---------------------------------------------------------------------------------------------------------------------------------|------------------------------------------------------------------------------------------------------------------|-------|-------|-------|----|
| 10. | I think the suitable amount of screen time for 3-6 year olds on weekends is at a maximum of X minutes                           | Open ended question                                                                                              | 0.670 | 0.517 | 0.782 | 69 |
| 11. | At the moment, what kind of role model do you feel like you are to your child concerning healthy health behaviors? Screen use   | 1=not very good.....5=very good                                                                                  | 0.695 | 0.546 | 0.801 | 68 |
| 12. | In our family we have rules about when the child can use screens.                                                               | 1=strongly disagree; 2=somewhat disagree; 3=neither disagree or agree; 4=somewhat agree; 5=strongly agree        | 0.579 | 0.397 | 0.716 | 69 |
| 13. | In our family we have rules about for how long the child can use screens.                                                       | 1=strongly disagree; 2=somewhat disagree; 3=neither disagree or agree; 4=somewhat agree; 5=strongly agree        | 0.459 | 0.254 | 0.625 | 69 |
| 14. | The child is aware about the rules concerning screen time.                                                                      | 1=strongly disagree; 2=somewhat disagree; 3=neither disagree or agree; 4=somewhat agree; 5=strongly agree        | 0.635 | 0.464 | 0.759 | 69 |
| 15. | Using screens is allowed at table.                                                                                              | 1=strongly disagree; 2=somewhat disagree; 3=neither disagree or agree; 4=somewhat agree; 5=strongly agree        | 0.712 | 0.574 | 0.811 | 69 |
| 16. | Portable screens (e.g. Tablets, phones) are kept in sight of the child.                                                         | 1=strongly disagree; 2=somewhat disagree; 3=neither disagree or agree; 4=somewhat agree; 5=strongly agree        | 0.621 | 0.452 | 0.747 | 69 |
| 17. | About how many hours a day do YOU usually use electronic devices during leisure time when your child is around? During weekdays | 1= not at all; 2= less than 30 min. 3= between 30 min and 1 hour; 4= 1-2 hours; 5= 3-4 hours; 6= 5 hours or more | 0.724 | 0.577 | 0.823 | 69 |
| 18. | About how many hours a day do YOU usually use electronic devices during leisure time when your child is around? During weekends | 1= not at all; 2= less than 30 min. 3= between 30 min and 1 hour; 4= 1-2 hours; 5= 3-4 hours; 6= 5 hours or more | 0.549 | 0.363 | 0.694 | 69 |
| 19. | How often during the last 6 months have you discussed with the staff of your child's preschool your child's screen use?         | 1=not once; 2=1-2 times; 3=3-5 times; 4=monthly; 5=weekly                                                        | 0.561 | 0.377 | 0.703 | 69 |

|     |                                                                                                                             |                                                           |       |       |       |    |
|-----|-----------------------------------------------------------------------------------------------------------------------------|-----------------------------------------------------------|-------|-------|-------|----|
| 20. | How often during the last 6 months have you discussed children's screen use with other parents from your child's preschool? | 1=not once; 2=1-2 times; 3=3-5 times; 4=monthly; 5=weekly | 0.624 | 0.455 | 0.749 | 69 |
|-----|-----------------------------------------------------------------------------------------------------------------------------|-----------------------------------------------------------|-------|-------|-------|----|

#### Physical activity

|    |                                                                                                                                      |                                                                                                                       |       |       |       |    |
|----|--------------------------------------------------------------------------------------------------------------------------------------|-----------------------------------------------------------------------------------------------------------------------|-------|-------|-------|----|
| 1. | I am pleased with my child's physical activity level                                                                                 | 1=strongly disagree; 2=somewhat disagree; 3=neither disagree or agree; 4=somewhat agree; 5=strongly agree             | 0.609 | 0.435 | 0.738 | 69 |
| 2. | How confident are you that you could do the following? I can get my child to be active enough.                                       | 1= not at all confident; 2= somewhat unconfident; 3= something between; 4= somewhat confident; 5= extremely confident | 0.486 | 0.285 | 0.646 | 69 |
| 3. | Sport as a hobby and the related costs (e.g. equipment, materials, subscription fees) are too expensive.                             | 1=strongly disagree; 2=somewhat disagree; 3=neither disagree or agree; 4=somewhat agree; 5=strongly agree             | 0.755 | 0.626 | 0.842 | 69 |
| 4. | I think the suitable amount of daily physical activity for 3-6-year old children is at least X minutes                               | Open ended question                                                                                                   | 0.468 | 0.265 | 0.632 | 69 |
| 5. | At the moment, what kind of role model do you feel like you are to your child concerning healthy health behaviors? Physical activity | 1=not very good.....5=very good                                                                                       | 0.760 | 0.640 | 0.844 | 69 |
| 6. | How often during the last month has your child visited the following places with at least one adult in the family? Nature/forest     | 1=not once; 2=1-3 times a month; 3=1-2 times a week; 4=3-6 times a week; 5=daily                                      | 0.634 | 0.467 | 0.758 | 67 |
| 7. | How often during the last month has your child visited the following places with at least one adult in the family? Park/playground   | 1=not once; 2=1-3 times a month; 3=1-2 times a week; 4=3-6 times a week; 5=daily                                      | 0.699 | 0.536 | 0.808 | 68 |
| 8. | How often during the last month has your child visited the following places with at least one adult in the family? Own yard          | 1=not once; 2=1-3 times a month; 3=1-2 times a week; 4=3-6 times a week; 5=daily                                      | 0.553 | 0.177 | 0.753 | 68 |

|     |                                                                                                                                                                          |                                                                                                           |                  |                  |                  |    |
|-----|--------------------------------------------------------------------------------------------------------------------------------------------------------------------------|-----------------------------------------------------------------------------------------------------------|------------------|------------------|------------------|----|
| 9.  | How often during the last month has your child visited the following places with at least one adult in the family? Indoor exercise facility (e.g. Swimming hall, gym)    | 1=not once; 2=1-3 times a month; 3=1-2 times a week; 4=3-6 times a week; 5=daily                          | 0.558            | 0.353            | 0.708            | 68 |
| 10. | Near our home there are places where I can make short excursions with my child.                                                                                          | 1=strongly disagree; 2=somewhat disagree; 3=neither disagree or agree; 4=somewhat agree; 5=strongly agree | 0.594            | 0.414            | 0.729            | 68 |
| 11. | There are outdoor areas, like parks, yards, and playgrounds, near my home where my child can play actively.                                                              | 1=strongly disagree; 2=somewhat disagree; 3=neither disagree or agree; 4=somewhat agree; 5=strongly agree | 0.759            | 0.636            | 0.844            | 68 |
| 12. | The outdoor areas in my neighborhood have plenty of swing sets, slides, or other play equipment my child can use.                                                        | 1=strongly disagree; 2=somewhat disagree; 3=neither disagree or agree; 4=somewhat agree; 5=strongly agree | 0.634            | 0.469            | 0.757            | 68 |
| 13. | The yard or area outside our home has plenty of room for my child to actively play games like tag or chase                                                               | 1=strongly disagree; 2=somewhat disagree; 3=neither disagree or agree; 4=somewhat agree; 5=strongly agree | 0.678            | 0.526            | 0.788            | 68 |
| 14. | My child has plenty of room to run around and burn off energy in our home.                                                                                               | 1=strongly disagree; 2=somewhat disagree; 3=neither disagree or agree; 4=somewhat agree; 5=strongly agree | 0.653            | 0.457            | 0.781            | 68 |
| 15. | How often during the last 6 months have you discussed with the staff of your child's preschool your child's physical activity?                                           | 1=not once; 2=1-2 times; 3=3-5 times; 4=monthly; 5=weekly                                                 | 0.396 /<br>0.379 | 0.181 /<br>0.034 | 0.576 /<br>0.302 | 69 |
| 16. | How often during the last 6 months have you discussed children's physical activity with other parents from your child's preschool?                                       | 1=not once; 2=1-2 times; 3=3-5 times; 4=monthly; 5=weekly                                                 | 0.716            | 0.577            | 0.814            | 69 |
| 17. | To what extent do you feel like the following things are a barrier to your child's physical activity/increasing physical activity? Lack of skills or means (Kappa value) | 1=not a barrier; 2=is a barrier to some extent; 3=is a barrier to a great extent                          | 0.698            | 0.479            | 0.918            | 67 |

|     |                                                                                                                                                                                                               |                                                                                  |       |       |       |    |
|-----|---------------------------------------------------------------------------------------------------------------------------------------------------------------------------------------------------------------|----------------------------------------------------------------------------------|-------|-------|-------|----|
| 18. | To what extent do you feel like the following things are a barrier to your child's physical activity/increasing physical activity? Lack of time (Kappa value)                                                 | 1=not a barrier; 2=is a barrier to some extent; 3=is a barrier to a great extent | 0.451 | 0.271 | 0.631 | 69 |
| 19. | To what extent do you feel like the following things are a barrier to your child's physical activity/increasing physical activity? Lack of support from the other parent. (Kappa value)                       | 1=not a barrier; 2=is a barrier to some extent; 3=is a barrier to a great extent | 0.492 | 0.305 | 0.679 | 66 |
| 20. | To what extent do you feel like the following things are a barrier to your child's physical activity/increasing physical activity? Lack of or distance to suitable places for physical activity (Kappa value) | 1=not a barrier; 2=is a barrier to some extent; 3=is a barrier to a great extent | 0.528 | 0.306 | 0.749 | 69 |
| 21. | To what extent do you feel like the following things are a barrier to your child's physical activity/increasing physical activity? Lack of PA equipment at home. (Kappa value)                                | 1=not a barrier; 2=is a barrier to some extent; 3=is a barrier to a great extent | 0.391 | 0.175 | 0.607 | 69 |
| 22. | To what extent do you feel like the following things are a barrier to your child's physical activity/increasing physical activity? Own coping. (Kappa value)                                                  | 1=not a barrier; 2=is a barrier to some extent; 3=is a barrier to a great extent | 0.390 | 0.217 | 0.563 | 69 |
| 23. | To what extent do you feel like the following things are a barrier to your child's physical activity/increasing physical activity? Child's resistance. (Kappa value)                                          | 1=not a barrier; 2=is a barrier to some extent; 3=is a barrier to a great extent | 0.284 | 0.069 | 0.499 | 69 |

#### **Vegetables, berries and fruit**

|    |                                                    |                                                                                                           |       |       |       |    |
|----|----------------------------------------------------|-----------------------------------------------------------------------------------------------------------|-------|-------|-------|----|
| 1. | I am pleased with my child's vegetable consumption | 1=strongly disagree; 2=somewhat disagree; 3=neither disagree or agree; 4=somewhat agree; 5=strongly agree | 0.685 | 0.536 | 0.793 | 69 |
|----|----------------------------------------------------|-----------------------------------------------------------------------------------------------------------|-------|-------|-------|----|

|     |                                                                                                            |                                                                                                                       |       |       |       |    |
|-----|------------------------------------------------------------------------------------------------------------|-----------------------------------------------------------------------------------------------------------------------|-------|-------|-------|----|
| 2.  | I am pleased with my child's fruit and berry consumption                                                   | 1=strongly disagree; 2=somewhat disagree; 3=neither disagree or agree; 4=somewhat agree; 5=strongly agree             | 0.675 | 0.522 | 0.786 | 69 |
| 3.  | How confident are you that you could do the following? I can get my child to eat enough vegetables.        | 1= not at all confident; 2= somewhat unconfident; 3= something between; 4= somewhat confident; 5= extremely confident | 0.709 | 0.568 | 0.809 | 69 |
| 4.  | How confident are you that you could do the following? I can get my child to eat enough fruit and berries. | 1= not at all confident; 2= somewhat unconfident; 3= something between; 4= somewhat confident; 5= extremely confident | 0.792 | 0.684 | 0.866 | 68 |
| 5.  | I show my child that I really like eating vegetables, fruit and berries.                                   | 1=strongly disagree; 2=somewhat disagree; 3=neither disagree or agree; 4=somewhat agree; 5=strongly agree             | 0.408 | 0.190 | 0.587 | 69 |
| 6.  | My child does not like vegetables.                                                                         | 1=strongly disagree; 2=somewhat disagree; 3=neither disagree or agree; 4=somewhat agree; 5=strongly agree             | 0.773 | 0.656 | 0.853 | 69 |
| 7.  | My child does not like fruit and berries.                                                                  | 1=strongly disagree; 2=somewhat disagree; 3=neither disagree or agree; 4=somewhat agree; 5=strongly agree             | 0.806 | 0.704 | 0.875 | 69 |
| 8.  | It is important for me to make sure my child eats enough vegetables, fruit and berries.                    | 1=strongly disagree; 2=somewhat disagree; 3=neither disagree or agree; 4=somewhat agree; 5=strongly agree             | 0.468 | 0.265 | 0.632 | 69 |
| 9.  | I think the suitable amount of vegetables for 3-6-year old children is: portions a day                     | Open ended question                                                                                                   | 0.568 | 0.381 | 0.711 | 66 |
| 10. | I think the suitable amount of fruit and berries for 3-6-year old children is: portions a day              | Open ended question                                                                                                   | 0.457 | 0.243 | 0.629 | 59 |
| 11. | How many different types of the following foods do you currently have at home? Fresh vegetables            | Open ended question                                                                                                   | 0.733 | 0.601 | 0.826 | 68 |
| 12. | How many different types of the following foods do you currently have at home? Fresh fruit and/or berries  | Open ended question                                                                                                   | 0.445 | 0.228 | 0.620 | 64 |
| 13. | How often do you have the following foods at home? Fresh vegetables                                        | 1= never; 2= rarely; 3= sometimes; 4= often; 5= always                                                                | 0.692 | 0.500 | 0.811 | 69 |

|     |                                                                                                                                                      |                                                                                  |       |       |       |    |
|-----|------------------------------------------------------------------------------------------------------------------------------------------------------|----------------------------------------------------------------------------------|-------|-------|-------|----|
| 14. | How often do you have the following foods at home? Frozen vegetables                                                                                 | 1= never; 2= rarely; 3= sometimes; 4= often; 5= always                           | 0.625 | 0.457 | 0.750 | 69 |
| 15. | How often do you have the following foods at home? Fresh fruit and/or berries                                                                        | 1= never; 2= rarely; 3= sometimes; 4= often; 5= always                           | 0.504 | 0.304 | 0.661 | 69 |
| 16. | How often do you have the following foods at home? Frozen fruit and/or berries                                                                       | 1= never; 2= rarely; 3= sometimes; 4= often; 5= always                           | 0.560 | 0.374 | 0.703 | 68 |
| 17. | If you have had fresh vegetables, have they been kept in sight of the child? (Kappa Value)                                                           | 1=no; 2=yes                                                                      | 0.597 | 0.350 | 0.844 | 63 |
| 18. | If you have had fresh fruit, have they been kept in sight of the child? (Kappa Value)                                                                | 1=no; 2=yes                                                                      | 0.306 | 0.065 | 0.547 | 66 |
| 19. | At the moment, what role model do you feel like you are to your child concerning healthy health behaviors? Consumption of fruit and vegetables       | 1=not very good.....5=very good                                                  | 0.705 | 0.561 | 0.807 | 68 |
| 20. | During the past week how often did you eat vegetables when you ate with your child?                                                                  | 1= never; 2= 1-2 times; 3= 3-4 times; 4= 5-6 times; 5= daily                     | 0.642 | 0.478 | 0.762 | 69 |
| 21. | During the past week how often did you eat fruit or berries when you ate with your child?                                                            | 1= never; 2= 1-2 times; 3= 3-4 times; 4= 5-6 times; 5= daily                     | 0.501 | 0.303 | 0.657 | 69 |
| 22. | How often during the last 6 months have you discussed with the staff of your child's preschool your child's consumption of fruit and vegetables?     | 1=not once; 2=1-2 times; 3=3-5 times; 4=monthly; 5=weekly                        | 0.464 | 0.256 | 0.631 | 69 |
| 23. | How often during the last 6 months have you discussed children's consumption of fruit and vegetables with other parents from your child's preschool? | 1=not once; 2=1-2 times; 3=3-5 times; 4=monthly; 5=weekly                        | 0.613 | 0.441 | 0.742 | 69 |
| 24. | To what extent do you feel like following things are a barrier to increasing your child's                                                            | 1=not a barrier; 2=is a barrier to some extent; 3=is a barrier to a great extent | 0.446 | 0.231 | 0.661 | 69 |

|     |                                                                                                                                                                               |                                                                                  |       |       |       |    |
|-----|-------------------------------------------------------------------------------------------------------------------------------------------------------------------------------|----------------------------------------------------------------------------------|-------|-------|-------|----|
|     | consumption of vegetables? Lack of skills or means. (Kappa value)                                                                                                             |                                                                                  |       |       |       |    |
| 25. | To what extent do you feel like following things are a barrier to increasing your child's consumption of vegetables? The laboriousness of preparing vegetables. (Kappa value) | 1=not a barrier; 2=is a barrier to some extent; 3=is a barrier to a great extent | 0.370 | 0.156 | 0.585 | 69 |
| 26. | To what extent do you feel like following things are a barrier to increasing your child's consumption of vegetables? The expensiveness of vegetables (Kappa value)            | 1=not a barrier; 2=is a barrier to some extent; 3=is a barrier to a great extent | 0.700 | 0.481 | 0.919 | 68 |
| 27. | To what extent do you feel like following things are a barrier to increasing your child's consumption of vegetables? Lack of support from the other parent. (Kappa value)     | 1=not a barrier; 2=is a barrier to some extent; 3=is a barrier to a great extent | 0.546 | 0.345 | 0.748 | 67 |
| 28. | To what extent do you feel like following things are a barrier to increasing your child's consumption of vegetables? Low availability of vegetables at home. (Kappa value)    | 1=not a barrier; 2=is a barrier to some extent; 3=is a barrier to a great extent | 0.361 | 0.146 | 0.576 | 69 |
| 29. | To what extent do you feel like following things are a barrier to increasing your child's consumption of vegetables? Child's resistance (Kappa value)                         | 1=not a barrier; 2=is a barrier to some extent; 3=is a barrier to a great extent | 0.373 | 0.201 | 0.546 | 69 |
| 30. | To what extent do you feel like following things are a barrier to increasing your child's consumption of vegetables? Parent(s) do not like vegetables. (Kappa value)          | 1=not a barrier; 2=is a barrier to some extent; 3=is a barrier to a great extent | 0.653 | 0.433 | 0.872 | 69 |
| 31. | To what extent do you feel like following things are a barrier to increasing your child's                                                                                     | 1=not a barrier; 2=is a barrier to some extent; 3=is a barrier to a great extent | 0.633 | 0.430 | 0.836 | 69 |

consumption of fruit? Lack of skills or means.  
(Kappa value)

|     |                                                                                                                                                                      |                                                                                  |       |       |       |    |
|-----|----------------------------------------------------------------------------------------------------------------------------------------------------------------------|----------------------------------------------------------------------------------|-------|-------|-------|----|
| 32. | To what extent do you feel like following things are a barrier to increasing your child's consumption of fruit? Labourousness of preparing fruit. (Kappa value)      | 1=not a barrier; 2=is a barrier to some extent; 3=is a barrier to a great extent | 0.539 | 0.322 | 0.756 | 69 |
| 33. | To what extent do you feel like following things are a barrier to increasing your child's consumption of fruit? The expensiveness of fruit. (Kappa value)            | 1=not a barrier; 2=is a barrier to some extent; 3=is a barrier to a great extent | 0.617 | 0.408 | 0.826 | 69 |
| 34. | To what extent do you feel like following things are a barrier to increasing your child's consumption of fruit? Lack of support from the other parent. (Kappa value) | 1=not a barrier; 2=is a barrier to some extent; 3=is a barrier to a great extent | 0.678 | 0.473 | 0.883 | 67 |
| 35. | To what extent do you feel like following things are a barrier to increasing your child's consumption of fruit? Low availability of fruit at home. (Kappa value)     | 1=not a barrier; 2=is a barrier to some extent; 3=is a barrier to a great extent | 0.628 | 0.398 | 0.857 | 69 |
| 36. | To what extent do you feel like following things are a barrier to increasing your child's consumption of fruit? Child's resistance. (Kappa value)                    | 1=not a barrier; 2=is a barrier to some extent; 3=is a barrier to a great extent | 0.483 | 0.299 | 0.667 | 69 |
| 37. | To what extent do you feel like following things are a barrier to increasing your child's consumption of fruit? Parent(s) do not like fruit. (Kappa value)           | 1=not a barrier; 2=is a barrier to some extent; 3=is a barrier to a great extent | 0.717 | 0.479 | 0.954 | 69 |

#### **Sugary foods and beverages**

|    |                                                                   |                                                                                                           |       |       |       |    |
|----|-------------------------------------------------------------------|-----------------------------------------------------------------------------------------------------------|-------|-------|-------|----|
| 1. | I am pleased with my child's consumption of sugary everyday foods | 1=strongly disagree; 2=somewhat disagree; 3=neither disagree or agree; 4=somewhat agree; 5=strongly agree | 0.518 | 0.320 | 0.672 | 69 |
|----|-------------------------------------------------------------------|-----------------------------------------------------------------------------------------------------------|-------|-------|-------|----|

|     |                                                                                                                                                         |                                                                                                                       |                  |                   |                  |    |
|-----|---------------------------------------------------------------------------------------------------------------------------------------------------------|-----------------------------------------------------------------------------------------------------------------------|------------------|-------------------|------------------|----|
| 2.  | I am pleased with my child's consumption of sugary beverages                                                                                            | 1=strongly disagree; 2=somewhat disagree; 3=neither disagree or agree; 4=somewhat agree; 5=strongly agree             | 0.616            | 0.445             | 0.744            | 68 |
| 3.  | I am pleased with my child's consumption of sugary treats                                                                                               | 1=strongly disagree; 2=somewhat disagree; 3=neither disagree or agree; 4=somewhat agree; 5=strongly agree             | 0.465            | 0.258             | 0.632            | 69 |
| 4.  | How confident are you that you could do the following? I can say no to my child's requests for sugary everyday foods even when the child has a tantrum. | 1= not at all confident; 2= somewhat unconfident; 3= something between; 4= somewhat confident; 5= extremely confident | 0.525            | 0.331             | 0.676            | 69 |
| 5.  | How confident are you that you could do the following? I can say no to my child's requests for sugary beverages even when the child has a tantrum.      | 1= not at all confident; 2= somewhat unconfident; 3= something between; 4= somewhat confident; 5= extremely confident | 0.493            | 0.290             | 0.653            | 69 |
| 6.  | How confident are you that you could do the following? I can say no to my child's requests for sugary treats even when the child has a tantrum.         | 1= not at all confident; 2= somewhat unconfident; 3= something between; 4= somewhat confident; 5= extremely confident | 0.504            | 0.305             | 0.661            | 69 |
| 7.  | Sometimes it seems like the only way to get my child to behave is to promise sugary foods, beverages or treats as treats.                               | 1=strongly disagree; 2=somewhat disagree; 3=neither disagree or agree; 4=somewhat agree; 5=strongly agree             | 0.751            | 0.627             | 0.838            | 69 |
| 8.  | It is important for me to limit my child's consumption of sugary everyday foods.                                                                        | 1=strongly disagree; 2=somewhat disagree; 3=neither disagree or agree; 4=somewhat agree; 5=strongly agree             | 0.689            | 0.541             | 0.795            | 69 |
| 9.  | It is important for me to limit my child's consumption of sugary beverages.                                                                             | 1=strongly disagree; 2=somewhat disagree; 3=neither disagree or agree; 4=somewhat agree; 5=strongly agree             | 0.146 /<br>0.292 | -0.086 /<br>0.075 | 0.366 /<br>0.509 | 69 |
| 10. | It is important for me to limit my child's consumption of sugary treats.                                                                                | 1=strongly disagree; 2=somewhat disagree; 3=neither disagree or agree; 4=somewhat agree; 5=strongly agree             | 0.470            | 0.266             | 0.635            | 68 |
| 11. | I think the suitable amount of sugary everyday foods for 3-6-year old children is:                                                                      | Open ended question                                                                                                   | 0.377 /<br>0.219 | 0.153 /<br>0.110  | 0.564 /<br>0.328 | 68 |

|     |                                                                                                                 |                                                        |                  |                  |                  |    |
|-----|-----------------------------------------------------------------------------------------------------------------|--------------------------------------------------------|------------------|------------------|------------------|----|
| 12. | I think the suitable amount of sugary drinks for 3-6-year old children is:                                      | Open ended question                                    | 0.426            | 0.193            | 0.613            | 59 |
| 13. | I think the suitable amount of sugary treats for 3-6-year old children is:                                      | Open ended question                                    | 0.388 /<br>0.310 | 0.172 /<br>0.191 | 0.570 /<br>0.429 | 68 |
| 14. | How often do you have the following foods at home? Yoghurt, quark etc. (also vegetable-based with added sugar   | 1= never; 2= rarely; 3= sometimes; 4= often; 5= always | 0.625            | 0.457            | 0.749            | 69 |
| 15. | How often do you have the following foods at home? Pudding                                                      | 1= never; 2= rarely; 3= sometimes; 4= often; 5= always | 0.748            | 0.620            | 0.838            | 69 |
| 16. | How often do you have the following foods at home? Sugar-sweetened cereals or muesli (more than 10g/100g sugar) | 1= never; 2= rarely; 3= sometimes; 4= often; 5= always | 0.712            | 0.573            | 0.811            | 69 |
| 17. | How often do you have the following foods at home? Syrup with added sugar                                       | 1= never; 2= rarely; 3= sometimes; 4= often; 5= always | 0.631            | 0.464            | 0.755            | 69 |
| 18. | How often do you have the following foods at home? Soft drinks with added sugar                                 | 1= never; 2= rarely; 3= sometimes; 4= often; 5= always | 0.593            | 0.415            | 0.727            | 69 |
| 19. | How often do you have the following foods at home? Berry sauce with added sugar                                 | 1= never; 2= rarely; 3= sometimes; 4= often; 5= always | 0.796            | 0.688            | 0.869            | 67 |
| 20. | How often do you have the following foods at home? Cakes, muffins, buns and sweet pastry                        | 1= never; 2= rarely; 3= sometimes; 4= often; 5= always | 0.389 /<br>0.380 | 0.171 /<br>0.222 | 0.571/<br>0.539  | 69 |
| 21. | How often do you have the following foods at home? Cookies                                                      | 1= never; 2= rarely; 3= sometimes; 4= often; 5= always | 0.722            | 0.585            | 0.819            |    |
| 22. | How often do you have the following foods at home? Chocolate and sweets                                         | 1= never; 2= rarely; 3= sometimes; 4= often; 5= always | 0.355 /<br>0.254 | 0.128 /<br>0.109 | 0.546 /<br>0.398 | 68 |
| 23. | How often do you have the following foods at home? Ice cream                                                    | 1= never; 2= rarely; 3= sometimes; 4= often; 5= always | 0.370 /<br>0.185 | 0.134 /<br>0.050 | 0.564 /<br>0.320 | 69 |

|     |                                                                                                                                                    |                                                        |       |       |       |    |
|-----|----------------------------------------------------------------------------------------------------------------------------------------------------|--------------------------------------------------------|-------|-------|-------|----|
| 24. | How often do you have the following foods at home? Jam                                                                                             | 1= never; 2= rarely; 3= sometimes; 4= often; 5= always | 0.629 | 0.461 | 0.753 | 69 |
| 25. | If you have had Sugar-sweetened cereals or muesli (more than 10g/100g sugar), have they been kept in sight of the child? (Kappa value)             | 1=no; 2=yes                                            | 0.661 | 0.406 | 0.916 | 59 |
| 26. | If you have had syrups with added sugar, has it been kept in sight of the child? (Kappa value)                                                     | 1=no; 2=yes                                            | 0.486 | 0.241 | 0.731 | 64 |
| 27. | If you have had soft drinks with added sugar, have they been kept in sight of the child? (Kappa value)                                             | 1=no; 2=yes                                            | 0.576 | 0.327 | 0.825 | 62 |
| 28. | If you have had cookies etc., have they been kept in sight of the child? (Kappa value)                                                             | 1=no; 2=yes                                            | 0.376 | 0.120 | 0.631 | 52 |
| 29. | If you have had sweet pastries, have they been kept in sight of the child? (Kappa value)                                                           | 1=no; 2=yes                                            | 0.308 | 0.059 | 0.557 | 59 |
| 30. | If you have had chocolate and sweets, have they been kept in sight of the child? (Kappa value)                                                     | 1=no; 2=yes                                            | 0.433 | 0.188 | 0.678 | 62 |
| 31. | At the moment, what kind of role model do you feel like you are to your child concerning healthy health behaviors? Consumption of sugary foods     | 1=not very good.....5=very good                        | 0.540 | 0.346 | 0.689 | 68 |
| 32. | At the moment, what kind of role model do you feel like you are to your child concerning healthy health behaviors? Consumption of sugary beverages | 1=not very good.....5=very good                        | 0.439 | 0.226 | 0.613 | 68 |
| 33. | At the moment, what kind of role model do you feel like you are to your child concerning healthy health behaviors? Consumption of sugary treats    | 1=not very good.....5=very good                        | 0.418 | 0.199 | 0.597 | 68 |

|     |                                                                                                 |                                                                                                           |                  |                   |                  |    |
|-----|-------------------------------------------------------------------------------------------------|-----------------------------------------------------------------------------------------------------------|------------------|-------------------|------------------|----|
| 34. | During the past week how often did you eat sugary everyday foods, when you ate with your child? | 1= never; 2= 1-2 times; 3= 3-4 times; 4= 5-6 times; 5= daily                                              | 0.531            | 0.337             | 0.681            | 69 |
| 35. | During the past week how often did you eat sugary treats, when you ate with your child?         | 1= never; 2= 1-2 times; 3= 3-4 times; 4= 5-6 times; 5= daily                                              | 0.383 /<br>0.231 | 0.166 /<br>0.076  | 0.566 /<br>0.386 | 69 |
| 36. | During the past week how often did you drink sugary beverages, when you ate with your child?    | 1= never; 2= 1-2 times; 3= 3-4 times; 4= 5-6 times; 5= daily                                              | 0.441            | 0.232             | 0.612            | 69 |
| 37. | We do not buy sugary everyday foods at home.                                                    | 1=strongly disagree; 2=somewhat disagree; 3=neither disagree or agree; 4=somewhat agree; 5=strongly agree | 0.520            | 0.321             | 0.674            | 68 |
| 38. | We have sugary everyday foods at home, but they are not available to the child.                 | 1=strongly disagree; 2=somewhat disagree; 3=neither disagree or agree; 4=somewhat agree; 5=strongly agree | 0.286 /<br>0.160 | 0.054 /<br>0.034  | 0.488 /<br>0.285 | 69 |
| 39. | We allow only a certain amount of sugary everyday foods per day/week to the child.              | 1=strongly disagree; 2=somewhat disagree; 3=neither disagree or agree; 4=somewhat agree; 5=strongly agree | 0.292 /<br>0.139 | 0.060 /<br>-0.011 | 0.494 /<br>0.290 | 69 |
| 40. | We do not buy sugary beverages at home.                                                         | 1=strongly disagree; 2=somewhat disagree; 3=neither disagree or agree; 4=somewhat agree; 5=strongly agree | 0.706            | 0.564             | 0.807            | 69 |
| 41. | We have sugary beverages at home, but they are not available to the child.                      | 1=strongly disagree; 2=somewhat disagree; 3=neither disagree or agree; 4=somewhat agree; 5=strongly agree | 0.458            | 0.249             | 0.626            | 69 |
| 42. | We allow only a certain amount of sugary beverages per day/week to the child.                   | 1=strongly disagree; 2=somewhat disagree; 3=neither disagree or agree; 4=somewhat agree; 5=strongly agree | 0.669            | 0.516             | 0.781            | 69 |
| 43. | We do not buy sugary treats at home.                                                            | 1=strongly disagree; 2=somewhat disagree; 3=neither disagree or agree; 4=somewhat agree; 5=strongly agree | 0.237 /<br>0.286 | -0.001 /<br>0.148 | 0.448 /<br>0.424 | 69 |
| 44. | We have sugary treats at home, but they are not available to the child.                         | 1=strongly disagree; 2=somewhat disagree; 3=neither disagree or agree; 4=somewhat agree; 5=strongly agree | 0.566            | 0.382             | 0.707            | 69 |
| 45. | We allow only a certain amount of sugary treats per day/week to the child.                      | 1=strongly disagree; 2=somewhat disagree; 3=neither disagree or agree; 4=somewhat agree; 5=strongly agree | 0.478            | 0.273             | 0.642            | 69 |

|     |                                                                                                                                                            |                                                           |       |       |       |    |
|-----|------------------------------------------------------------------------------------------------------------------------------------------------------------|-----------------------------------------------------------|-------|-------|-------|----|
| 46. | How often during the last 6 months have you discussed with the staff of your child's preschool your child's consumption of sugary foods and beverages?     | 1=not once; 2=1-2 times; 3=3-5 times; 4=monthly; 5=weekly | 0.477 | 0.274 | 0.640 | 69 |
| 47. | How often during the last 6 months have you discussed children's consumption of sugary foods and beverages with other parents from your child's preschool? | 1=not once; 2=1-2 times; 3=3-5 times; 4=monthly; 5=weekly | 0.601 | 0.426 | 0.733 | 69 |

#### Child's self-regulation skills

|     |                                                                                                        |                                                |       |       |       |    |
|-----|--------------------------------------------------------------------------------------------------------|------------------------------------------------|-------|-------|-------|----|
| 1.  | My child Does not need much help with tasks.                                                           | 1=not true; 2=somewhat true; 3=certainly true; | 0.458 | 0.252 | 0.625 | 69 |
| 2.  | My child Persists in the face of difficult tasks                                                       | 1=not true; 2=somewhat true; 3=certainly true; | 0.639 | 0.473 | 0.761 | 68 |
| 3.  | My child Likes to work things out for her/himself; seeks help only when necessary, or as a last resort | 1=not true; 2=somewhat true; 3=certainly true; | 0.415 | 0.201 | 0.592 | 69 |
| 4.  | My child Can move to a new activity after finishing a task                                             | 1=not true; 2=somewhat true; 3=certainly true; | 0.510 | 0.304 | 0.668 | 69 |
| 5.  | My child Chooses activities on their own                                                               | 1=not true; 2=somewhat true; 3=certainly true; | 0.626 | 0.459 | 0.750 | 69 |
| 6.  | My child Shows wide mood swings                                                                        | 1=not true; 2=somewhat true; 3=certainly true; | 0.594 | 0.417 | 0.727 | 69 |
| 7.  | My child Is easily frustrated                                                                          | 1=not true; 2=somewhat true; 3=certainly true; | 0.548 | 0.359 | 0.694 | 69 |
| 8.  | My child Is impulsive, acts without thinking                                                           | 1=not true; 2=somewhat true; 3=certainly true; | 0.642 | 0.477 | 0.763 | 68 |
| 9.  | My child Gets over excited                                                                             | 1=not true; 2=somewhat true; 3=certainly true; | 0.427 | 0.212 | 0.602 | 69 |
| 10. | My child Gets over being upset quickly                                                                 | 1=not true; 2=somewhat true; 3=certainly true; | 0.353 | 0.128 | 0.543 | 69 |

#### Other food products

|     |                                                                                                                                            |                                                        |       |       |       |    |
|-----|--------------------------------------------------------------------------------------------------------------------------------------------|--------------------------------------------------------|-------|-------|-------|----|
| 1.  | How often do you have the following foods at home? Yoghurt, quark etc. (also vegetable-based without added sugar                           | 1= never; 2= rarely; 3= sometimes; 4= often; 5= always | 0.634 | 0.468 | 0.757 | 69 |
| 2.  | How often do you have the following foods at home? Unseasoned nuts, almonds and/or seeds.                                                  | 1= never; 2= rarely; 3= sometimes; 4= often; 5= always | 0.767 | 0.650 | 0.849 | 69 |
| 3.  | How often do you have the following foods at home? Unseasoned oatmeal etc.                                                                 | 1= never; 2= rarely; 3= sometimes; 4= often; 5= always | 0.476 | 0.274 | 0.638 | 69 |
| 4.  | How often do you have the following foods at home? Cereals with no or little added sugar (less than 10g/100g sugar)                        | 1= never; 2= rarely; 3= sometimes; 4= often; 5= always | 0.426 | 0.212 | 0.601 | 69 |
| 5.  | How often do you have the following foods at home? Fruit smoothies or purees with no added sugar                                           | 1= never; 2= rarely; 3= sometimes; 4= often; 5= always | 0.847 | 0.763 | 0.903 | 67 |
| 6.  | How often do you have the following foods at home? Juice with no or little added sugar                                                     | 1= never; 2= rarely; 3= sometimes; 4= often; 5= always | 0.563 | 0.372 | 0.707 | 68 |
| 7.  | How often do you have the following foods at home? Soft drinks with no or little added sugar                                               | 1= never; 2= rarely; 3= sometimes; 4= often; 5= always | 0.692 | 0.545 | 0.798 | 69 |
| 8.  | If you have had unseasoned nuts, almonds or seeds, have they been kept in sight of the child? (Kappa value)                                | 1=no; 2=yes                                            | 0.451 | 0.203 | 0.700 | 62 |
| 9.  | If you have had unseasoned oatmeal, has it been kept in sight of the child? (Kappa value)                                                  | 1=no; 2=yes                                            | 0.500 | 0.255 | 0.745 | 64 |
| 10. | If you have had cereals with no or little added sugar (less than 10g/100g sugar), have they been kept in sight of the child? (Kappa value) | 1=no; 2=yes                                            | 0.311 | 0.049 | 0.573 | 56 |

|     |                                                                                                                     |             |       |       |       |    |
|-----|---------------------------------------------------------------------------------------------------------------------|-------------|-------|-------|-------|----|
| 11. | If you have had juice with no or little added sugar, have they been kept in sight of the child? (Kappa value)       | 1=no; 2=yes | 0.513 | 0.246 | 0.779 | 54 |
| 12. | If you have had soft drinks with no or little added sugar, have they been kept in sight of the child? (Kappa value) | 1=no; 2=yes | 0.283 | 0.011 | 0.555 | 69 |

#### Sociodemographic

|    |                                                               |                                                                                                                                                 |       |       |       |    |
|----|---------------------------------------------------------------|-------------------------------------------------------------------------------------------------------------------------------------------------|-------|-------|-------|----|
| 1. | Your age                                                      | Open ended question                                                                                                                             | 0.997 | 0.995 | 0.998 | 68 |
| 2. | Child's age                                                   | Open ended question                                                                                                                             | 1.00  | 1.00  | 1.00  | 69 |
| 3. | Child's gender (Kappa value)                                  | 1=girl, 2=boy                                                                                                                                   | 1.00  | 0.764 | 1.236 | 69 |
| 4. | Your educational level (Kappa value)                          | 1=Comprehensive school, 2=Vocational school, 3=High school, 4=Bachelor's degree / college, 5=Master's degree, 6=Licentiate/doctor, 7=else, what | 0.900 | 0.760 | 1.040 | 69 |
| 5. | The educational level of the spouse (if having) (Kappa value) | 1=Comprehensive school, 2=Vocational school, 3=High school, 4=Bachelor's degree / college, 5=Master's degree, 6=Licentiate/doctor, 7=else, what | 0.878 | 0.729 | 1.027 | 56 |

#### Other

|    |                                                                     |                                                  |       |       |       |    |
|----|---------------------------------------------------------------------|--------------------------------------------------|-------|-------|-------|----|
| 1. | How stressed out do you feel at the moment on a scale between 1-10? | 1=not at all stressed out, 10= very stressed out | 0.439 | 0.228 | 0.612 | 67 |
|----|---------------------------------------------------------------------|--------------------------------------------------|-------|-------|-------|----|

---

**Supplement Table 2.** The intraclass correlations (ICCs) or Kappa values ( $\kappa$ ) of preschool personnel questionnaire items in the DAGIS reproducibility sub-study. If both values are reported, the order is ICC/  $\kappa$ . If only Kappa value is presented, it is indicated in parenthesis after item.

| Preschool personnels' questionnaire |                                                                                                                                           | Response options                                                        | ICC / $\kappa$ | 95 % confidence interval |               | N  |
|-------------------------------------|-------------------------------------------------------------------------------------------------------------------------------------------|-------------------------------------------------------------------------|----------------|--------------------------|---------------|----|
| Sedentary behavior and screen time  |                                                                                                                                           |                                                                         |                |                          |               |    |
| 1.                                  | At the moment, to what extent can you impact the following things in your preschool? Children's screen use                                | 1=not at all; 2= not much; 3=to some extent; 4=quite a lot; 5=very much | 0.676          | 0.509                    | 0.794         | 59 |
| 2.                                  | How often during the last 6 months have you discussed with the parents of the children in your group about the child's screen use?        | 1=not once; 2=1-2 times; 3=3-5 times; 4=monthly; 5=weekly               | 0.443          | 0.213                    | 0.627         | 59 |
| 3.                                  | I think the suitable amount of screen time on weekdays for 3-6-year-olds is at a maximum of: X minutes per day                            | Open ended question                                                     | 0.587          | 0.390                    | 0.732         | 59 |
| 4.                                  | I think the suitable amount of screen time on weekends for 3-6-year-olds is at a maximum of: X minutes per day                            | Open ended question                                                     | 0.695          | 0.538                    | 0.805         | 60 |
| Physical activity                   |                                                                                                                                           |                                                                         |                |                          |               |    |
| 1.                                  | At the moment, to what extent can you impact the following things in your preschool? Children's physical activity                         | 1=not at all; 2= not much; 3=to some extent; 4=quite a lot; 5=very much | 0.624          | 0.436                    | 0.759         | 59 |
| 2.                                  | How often during the last 6 months have you discussed with the parents of the children in your group about the child's physical activity? | 1=not once; 2=1-2 times; 3=3-5 times; 4=monthly; 5=weekly               | 0.496          | 0.275                    | 0.666         | 59 |
| 3.                                  | I think that according to recommendations 3-6-year-old children should be physically active at least X minutes per day                    | Open ended question                                                     | 0.255 / 0.211  | 0.004 / 0.069            | 0.476 / 0.353 | 60 |
| Vegetables, berries and fruit       |                                                                                                                                           |                                                                         |                |                          |               |    |
| 1.                                  | At the moment, to what extent can you impact the following things in your preschool? Children's vegetable consumption                     | 1=not at all; 2= not much; 3=to some extent; 4=quite a lot; 5=very much | 0.199 / 0.171  | -0.060 / -0.012          | 0.431 / 0.355 | 60 |

|    |                                                                                                                                                                      |                                                                         |                  |                  |                  |    |
|----|----------------------------------------------------------------------------------------------------------------------------------------------------------------------|-------------------------------------------------------------------------|------------------|------------------|------------------|----|
| 2. | At the moment, to what extent can you impact the following things in your preschool? Children's fruit and berry consumption                                          | 1=not at all; 2= not much; 3=to some extent; 4=quite a lot; 5=very much | 0.346 /<br>0.420 | 0.102 /<br>0.237 | 0.551 /<br>0.603 | 59 |
| 3. | How often during the last week did you encourage the children to eat a variety of vegetables, fruit and berries in a versatile manner?                               | 1=not once; 2=once; 3=twice; 4=3-4 times; 5=every day                   | 0.256 /<br>0.225 | 0.014 /<br>0.060 | 0.474 /<br>0.391 | 59 |
| 4. | How often during the last 6 months have you discussed with the parents of the children in your group about the child's consumption of vegetables, fruit and berries? | 1=not once; 2=1-2 times; 3=3-5 times; 4=monthly; 5=weekly               | 0.583            | 0.385            | 0.730            | 59 |
| 5. | I think that according to nutrition recommendations 3-6-year-old children should eat vegetables, fruit and berries daily, a minimum of: X portions per day.          | Open ended question                                                     | 0.619            | 0.432            | 0.755            | 59 |

#### **Sugary foods and beverages**

|    |                                                                                                                                                                         |                                                                         |                  |                    |                  |    |
|----|-------------------------------------------------------------------------------------------------------------------------------------------------------------------------|-------------------------------------------------------------------------|------------------|--------------------|------------------|----|
| 1. | At the moment, to what extent can you impact the following things in your preschool? Children's consumption of sugar-containing foods                                   | 1=not at all; 2= not much; 3=to some extent; 4=quite a lot; 5=very much | 0.156 /<br>0.064 | -0.100 /<br>-0.087 | 0.393 /<br>0.215 | 60 |
| 2. | At the moment, to what extent can you impact the following things in your preschool? Children's consumption of sugar-sweetened beverages                                | 1=not at all; 2= not much; 3=to some extent; 4=quite a lot; 5=very much | 0.206 /<br>0.131 | -0.052 /<br>-0.004 | 0.437 /<br>0.266 | 59 |
| 3. | How often during the last 6 months have you discussed with the parents of the children in your group about the child's consumption of sugar-containing food and drinks? | 1=not once; 2=1-2 times; 3=3-5 times; 4=monthly; 5=weekly               | 0.422            | 0.194              | 0.609            | 58 |
| 4. | I think the suitable amount of sugary everyday food for 3-6-year-olds is at a maximum of:                                                                               | Open ended question                                                     | 0.605            | 0.411              | 0.747            | 57 |
| 5. | I think the suitable amount of sugary treats for 3-6-year-olds is at a maximum of:                                                                                      | Open ended question                                                     | 0.537            | 0.324              | 0.699            | 57 |

|    |                                                                                    |                     |       |       |       |    |
|----|------------------------------------------------------------------------------------|---------------------|-------|-------|-------|----|
| 6. | I think the suitable amount of sugary drinks for 3-6-year-olds is at a maximum of: | Open ended question | 0.772 | 0.634 | 0.862 | 52 |
|----|------------------------------------------------------------------------------------|---------------------|-------|-------|-------|----|

#### Eating

|    |                                                                                                                            |  |        |        |       |    |
|----|----------------------------------------------------------------------------------------------------------------------------|--|--------|--------|-------|----|
| 1. | How often during the last week did you eat the same food at the same table with the children during lunch?                 |  | 0.877  | 0.802  | 0.925 | 59 |
| 2. | How often during the last week did you eat the same food as the children but not in the same table at lunch? (Kappa value) |  | -0.009 | -0.268 | 0.251 | 59 |

#### Self-regulation skills

|    |                                                                                  |                                                                                                           |                  |                  |                  |    |
|----|----------------------------------------------------------------------------------|-----------------------------------------------------------------------------------------------------------|------------------|------------------|------------------|----|
| 1. | I have enough means and capability to support children's self-regulation skills. | 1=strongly disagree; 2=somewhat disagree; 3=neither disagree or agree; 4=somewhat agree; 5=strongly agree | 0.631            | 0.451            | 0.762            | 59 |
| 2. | I can support my group's children to calm down and concentrate.                  | 1=strongly disagree; 2=somewhat disagree; 3=neither disagree or agree; 4=somewhat agree; 5=strongly agree | 0.678            | 0.513            | 0.795            | 60 |
| 3. | I can support my group's children to recognize their emotions.                   | 1=strongly disagree; 2=somewhat disagree; 3=neither disagree or agree; 4=somewhat agree; 5=strongly agree | 0.311 /<br>0.359 | 0.061 /<br>0.151 | 0.524 /<br>0.568 | 60 |
| 4. | In my group, difficulties in emotion regulation are very common.                 | 1=strongly disagree; 2=somewhat disagree; 3=neither disagree or agree; 4=somewhat agree; 5=strongly agree | 0.486            | 0.266            | 0.660            | 58 |

|    |                                                                                                                                         |                                                                                                           |       |       |       |    |
|----|-----------------------------------------------------------------------------------------------------------------------------------------|-----------------------------------------------------------------------------------------------------------|-------|-------|-------|----|
| 5. | In my group it is very common that calming down and concentrating is difficult.                                                         | 1=strongly disagree; 2=somewhat disagree; 3=neither disagree or agree; 4=somewhat agree; 5=strongly agree | 0.433 | 0.197 | 0.621 | 58 |
| 6. | Overall, I am satisfied with the self-regulation skills of the children in my group.                                                    | 1=strongly disagree; 2=somewhat disagree; 3=neither disagree or agree; 4=somewhat agree; 5=strongly agree | 0.615 | 0.428 | 0.751 | 60 |
| 7. | How often during the last 6 months have you discussed with the parents of the children in your group about the child's self-regulation? | 1=not once; 2=1-2 times; 3=3-5 times; 4=monthly; 5=weekly                                                 | 0.541 | 0.333 | 0.699 | 59 |

#### **Work wellbeing**

|    |                                                                                      |                                                                                         |       |       |       |    |
|----|--------------------------------------------------------------------------------------|-----------------------------------------------------------------------------------------|-------|-------|-------|----|
| 1. | On a scale of 1-10, how stressed out are you about your work?                        | 1=not at all stressed out, 10= very stressed out                                        | 0.577 | 0.356 | 0.738 | 48 |
| 2. | If needed, can you get support and help with your work from your co-workers?         | 1=Rarely or never; 2= quite rarely; 3=sometimes; 4=quite often; 5=very often or always; | 0.650 | 0.478 | 0.775 | 60 |
| 3. | If needed, can you get support and help with your work from your immediate superior? | 1=Rarely or never; 2= quite rarely; 3=sometimes; 4=quite often; 5=very often or always; | 0.723 | 0.577 | 0.824 | 61 |
| 4. | If needed, is your immediate willing to listen to your task-related problems?        | 1=Rarely or never; 2= quite rarely; 3=sometimes; 4=quite often; 5=very often or always; | 0.616 | 0.432 | 0.751 | 61 |
| 5. | If needed, are your co-workers willing to listen to your work-related problems?      | 1=Rarely or never; 2= quite rarely; 3=sometimes; 4=quite often; 5=very often or always; | 0.693 | 0.536 | 0.804 | 61 |

|     |                                                                                                  |                                                                                         |                  |                   |                  |    |
|-----|--------------------------------------------------------------------------------------------------|-----------------------------------------------------------------------------------------|------------------|-------------------|------------------|----|
| 6.  | Are your work achievements appreciated by your immediate superior?                               | 1=Rarely or never; 2= quite rarely; 3=sometimes; 4=quite often; 5=very often or always; | 0.677            | 0.515             | 0.793            | 61 |
| 7.  | Do the workers take initiatives at your preschool?                                               | 1=Rarely or never; 2= quite rarely; 3=sometimes; 4=quite often; 5=very often or always; | 0.698            | 0.544             | 0.807            | 61 |
| 8.  | Are workers encouraged to think of ways to do things better at your workplace?                   | 1=Rarely or never; 2= quite rarely; 3=sometimes; 4=quite often; 5=very often or always; | 0.261 /<br>0.189 | 0.010 /<br>-0.001 | 0.480 /<br>0.379 | 61 |
| 9.  | Do you appreciate your membership of your group?                                                 | 1=Rarely or never; 2= quite rarely; 3=sometimes; 4=quite often; 5=very often or always; | 0.411            | 0.183             | 0.599            | 60 |
| 10. | Is the management of your organization interested in the health and well-being of the personnel? | 1=Rarely or never; 2= quite rarely; 3=sometimes; 4=quite often; 5=very often or always; | 0.677            | 0.505             | 0.796            | 60 |
| 11. | Is there sufficient communication within your work community?                                    | 1=Rarely or never; 2= quite rarely; 3=sometimes; 4=quite often; 5=very often or always; | 0.661            | 0.492             | 0.782            | 61 |
| 12. | Does your group or team work flexibly?                                                           | 1=Rarely or never; 2= quite rarely; 3=sometimes; 4=quite often; 5=very often or always; | 0.730            | 0.586             | 0.829            | 60 |
| 13. | Is your group or team successful at problem solving?                                             | 1=Rarely or never; 2= quite rarely; 3=sometimes; 4=quite often; 5=very often or always; | 0.732            | 0.589             | 0.831            | 60 |

#### Sociodemographic

|    |                                                                   |                                                                                                                                                                   |       |       |       |    |
|----|-------------------------------------------------------------------|-------------------------------------------------------------------------------------------------------------------------------------------------------------------|-------|-------|-------|----|
| 1. | Your education concerning early childhood education (Kappa value) | 1=Master's Degree (in education, specialized in ECE); 2=Bachelor's in education (Kindergarten teacher, University); 3=bachelor of social services; 4=Kindergarten | 0.865 | 0.740 | 0.989 | 60 |
|----|-------------------------------------------------------------------|-------------------------------------------------------------------------------------------------------------------------------------------------------------------|-------|-------|-------|----|

|                                           |                                                                                                                                                                            |       |       |       |    |
|-------------------------------------------|----------------------------------------------------------------------------------------------------------------------------------------------------------------------------|-------|-------|-------|----|
|                                           | teacher, college-level training; 5=Social<br>pedagogue/educator (college-level);<br>6=Vocational qualification in social and health<br>care (nursery nurse); 7= Else, what |       |       |       |    |
| 2. What is your occupation? (Kappa value) | 1=early childhood special teacher; 2=<br>kindergarten teacher; 3=nursery nurse;<br>4=assistant; 5=Else, what;                                                              | 0.833 | 0.671 | 0.994 | 60 |
| 3. Gender (Kappa value)                   | 1=woman; 2=man; 3=I don't want to answer                                                                                                                                   | 1.00  | 0.749 | 1.251 | 61 |
| 4. Age                                    | Open ended question                                                                                                                                                        | 0.994 | 0.990 | 0.996 | 60 |

**Supplement Table 3.** The intraclass correlations (ICCs) of screen time diary in the DAGIS reproducibility sub-study.

| Screen time diary*                                     | ICC   | 95% confidence interval |       | N  |
|--------------------------------------------------------|-------|-------------------------|-------|----|
| Average screen time                                    | 0.652 | 0.480                   | 0.776 | 61 |
| Average TV use                                         | 0.726 | 0.588                   | 0.823 | 65 |
| Average DVD use                                        | 0.311 | 0.072                   | 0.515 | 65 |
| Average tablet use                                     | 0.769 | 0.648                   | 0.853 | 65 |
| Average smart phone use                                | 0.575 | 0.385                   | 0.717 | 65 |
| Average computer use                                   | 0.810 | 0.707                   | 0.880 | 65 |
| Average screen use together with at least one guardian | 0.373 | 0.148                   | 0.562 | 65 |
| Average screen use before sleep                        | 0.163 | -0.086                  | 0.391 | 65 |

\*The guardians were asked to report how many hours and minutes child had done the listed activities per day.

**Supplement Table 4.** The intraclass correlation coefficients (ICCs) of food consumption measures in the DAGIS reproducibility sub-study.

|                                                     | Food consumption frequency * |                         |       | Calculated food consumption (g/day) |        |                         |       |    |
|-----------------------------------------------------|------------------------------|-------------------------|-------|-------------------------------------|--------|-------------------------|-------|----|
|                                                     | (times/day)                  |                         |       | N                                   | ICC    | 95% confidence interval |       | N  |
|                                                     | ICC                          | 95% confidence interval |       |                                     |        |                         |       |    |
| <b>Vegetables, fruit and berries</b>                |                              |                         |       |                                     |        |                         |       |    |
| Fresh vegetables                                    | 0.472                        | 0.236                   | 0.655 | 54                                  | 0.671  | 0.493                   | 0.795 | 54 |
| Cooked and canned vegetables                        | 0.607                        | 0.407                   | 0.751 | 54                                  | 0.424  | 0.178                   | 0.620 | 54 |
| Peas, beans, lentils and soya                       | 0.402                        | 0.153                   | 0.603 | 54                                  | -      | -                       | -     | -  |
| Fresh fruit                                         | 0.669                        | 0.485                   | 0.797 | 51                                  | 0.752  | 0.603                   | 0.850 | 51 |
| Canned and frozen fruit                             | 0.479                        | 0.232                   | 0.669 | 49                                  | 0.509  | 0.282                   | 0.682 | 54 |
| Berries                                             | 0.252                        | -0.022                  | 0.492 | 51                                  | 0.692  | 0.518                   | 0.811 | 52 |
| Dried fruit and berries                             | 0.273                        | -0.010                  | 0.515 | 48                                  | 0.397  | 0.142                   | 0.603 | 52 |
| Commercial baby foods and smoothies                 | 0.644                        | 0.437                   | 0.786 | 46                                  | 0.549  | 0.327                   | 0.714 | 52 |
| <b>Dairy products</b>                               |                              |                         |       |                                     |        |                         |       |    |
| Flavored and sweetened milk- and plant-based drinks | 0.572                        | 0.354                   | 0.731 | 51                                  | 0.408  | 0.155                   | 0.611 | 52 |
| Natural yogurt and quark                            | 0.719                        | 0.551                   | 0.831 | 49                                  | 0.613  | 0.411                   | 0.758 | 52 |
| Flavored yogurt and quark                           | 0.320                        | 0.054                   | 0.543 | 52                                  | 0.626  | 0.430                   | 0.765 | 53 |
| Puddings                                            | 0.576                        | 0.356                   | 0.735 | 50                                  | 0.423  | 0.175                   | 0.621 | 53 |
| Ice cream                                           | 0.149                        | -0.130                  | 0.405 | 51                                  | 0.255  | -0.014                  | 0.490 | 53 |
| <b>Cereal products</b>                              |                              |                         |       |                                     |        |                         |       |    |
| Sugar-sweetened cereals and muesli                  | 0.550                        | 0.333                   | 0.711 | 54                                  | 0.533  | 0.311                   | 0.699 | 54 |
| Low- or non-sugar-containing cereals and muesli     | 0.503                        | 0.267                   | 0.683 | 51                                  | 0.461  | 0.220                   | 0.649 | 53 |
| Berry, fruit and chocolate porridge                 | 0.195                        | -0.083                  | 0.445 | 51                                  | 0.410  | 0.162                   | 0.609 | 54 |
| Sweet biscuits and cereal bars                      | 0.577                        | 0.362                   | 0.733 | 52                                  | 0.620  | 0.423                   | 0.762 | 53 |
| Sweet pastries                                      | 0.324                        | 0.059                   | 0.547 | 52                                  | 0.419  | 0.173                   | 0.616 | 54 |
| <b>Drinks</b>                                       |                              |                         |       |                                     |        |                         |       |    |
| Sugar-sweetened juice drinks                        | 0.490                        | 0.258                   | 0.669 | 54                                  | 0.579  | 0.370                   | 0.732 | 54 |
| Soft drinks                                         | 0.567                        | 0.350                   | 0.726 | 52                                  | 0.499  | 0.269                   | 0.675 | 54 |
| Reduced sugar juices and soft drinks                | 0.000                        | -0.268                  | 0.268 | 53                                  | -0.009 | -0.274                  | 0.257 | 54 |
| <b>Others</b>                                       |                              |                         |       |                                     |        |                         |       |    |
| Chocolate                                           | 0.492                        | 0.258                   | 0.671 | 53                                  | 0.514  | 0.287                   | 0.686 | 54 |
| Sweets                                              | 0.384                        | 0.132                   | 0.590 | 54                                  | 0.349  | 0.092                   | 0.562 | 54 |
| Added sugar, honey or syrup                         | 0.758                        | 0.614                   | 0.854 | 52                                  | 0.807  | 0.689                   | 0.883 | 54 |
| Jams, marmalades and sweetened spreads              | 0.516                        | 0.280                   | 0.694 | 50                                  | 0.582  | 0.374                   | 0.734 | 54 |

\* The guardians were asked to report how many times during the past week the child had consumed different foods at home or in places other than preschool.
